# Supplementary material for: Establishment of P38Bf, a Core-Fucose-Deficient Mouse-Canine Chimeric Antibody Against Dog Podoplanin
Source: PubMed Central journal article supplement (PMC6208159; doi:10.1089/mab.2018.0035), 2018-10-24
Supplement: Supp_Fig1.pdf [file Supp_Fig1.pdf]

## Supplementary Data

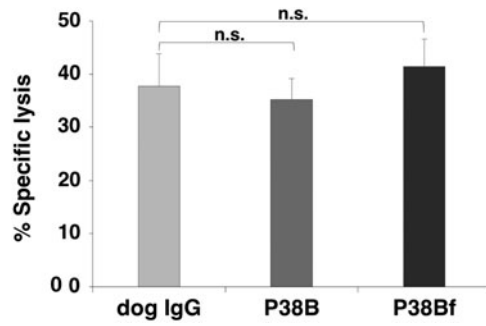

**SUPPLEMENTARY FIG. S1.** ADCC activity of P38B, and P38Bf against CHO-K1/luc cells. ADCC against parental luciferase-expressing CHO-K1 cells was determined as described in Figure 4. ADCC, antibody-dependent cellular cytotoxicity; CHO, Chinese hamster ovary; n.s., not significant.
